# Supplementary material
Source: PubMed Central journal article supplement (PMC4784814)
Supplement: saas026809.ww1_default.pdf [file saas026809.ww1_default.pdf]

Supplementary figure 1 Age distribution at breast cancer diagnosis in the Netherlands Cancer Registry from 1999-2012

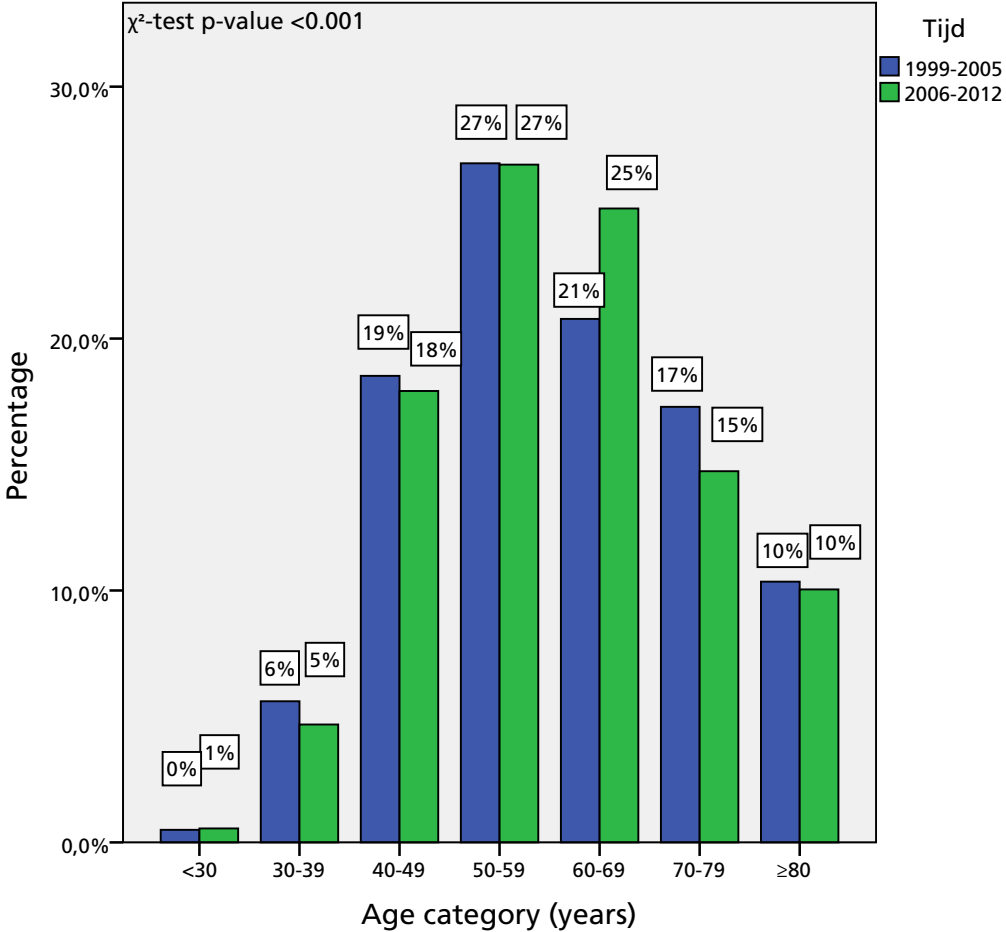

Supplementary table 1 Cox multivariable analyses of clinicopathological variables for 5-years overall mortality in breast cancer patients in the Netherlands Cancer Registry from 1999-2005 and 2006-2012

| Clinicopathological variables         | 1999-2005 |                     |         | 2006-2012 |                     |         |
|---------------------------------------|-----------|---------------------|---------|-----------|---------------------|---------|
|                                       | Number    | HR (95% CI)         | P-value | Number    | HR (95% CI)         | P-value |
| <b>Age at diagnosis in years</b>      | 79,997    | 1.05 (1.05 to 1.05) | <0.001  | 93,497    | 1.05 (1.04 to 1.05) | <0.001  |
| <b>Pathological tumour category</b>   |           |                     |         |           |                     |         |
| Ductal carcinoma in situ              | 6,752     | 0.75 (0.62 to 0.90) | 0.002   | 10,306    | 0.58 (0.48 to 0.70) | <0.001  |
| T1a                                   | 2,393     | Ref                 |         | 3,840     | Ref                 |         |
| T1b                                   | 9,589     | 1.12 (0.94 to 1.32) | 0.211   | 12,207    | 1.02 (0.86 to 1.22) | 0.819   |
| T1c                                   | 29,100    | 1.65 (1.41 to 1.93) | <0.001  | 34,156    | 1.59 (1.35 to 1.86) | <0.001  |
| T2                                    | 26,597    | 2.42 (2.07 to 2.83) | <0.001  | 27,937    | 2.32 (1.97 to 2.73) | <0.001  |
| T3                                    | 2,710     | 3.48 (2.94 to 4.1)  | <0.001  | 3,212     | 3.02 (2.53 to 3.61) | <0.001  |
| T4                                    | 2,856     | 3.72 (3.15 to 4.4)  | <0.001  | 1,839     | 3.59 (3.02 to 4.3)  | <0.001  |
| <b>Pathological node category</b>     |           |                     |         |           |                     |         |
| N0                                    | 52,015    | Ref                 |         | 63,476    | Ref                 |         |
| N1                                    | 19,006    | 1.53 (1.45 to 1.61) | <0.001  | 21,899    | 1.26 (1.19 to 1.35) | <0.001  |
| N2                                    | 5,983     | 2.83 (2.64 to 3.03) | <0.001  | 5,398     | 2.39 (2.18 to 2.63) | <0.001  |
| N3                                    | 2,993     | 4.6 (4.3 to 5.0)    | <0.001  | 2,724     | 4.1 (3.72 to 4.5)   | <0.001  |
| <b>B&amp;R grade</b>                  |           |                     |         |           |                     |         |
| Grade 1                               | 12,883    | Ref                 |         | 18,972    | Ref                 |         |
| Grade 2                               | 28,652    | 1.25 (1.17 to 1.33) | <0.001  | 35,817    | 1.26 (1.17 to 1.36) | <0.001  |
| Grade 3 (including anaplastic)        | 23,920    | 2.02 (1.89 to 2.16) | <0.001  | 27,099    | 2.08 (1.93 to 2.25) | <0.001  |
| Unknown                               | 14,542    | 1.52 (1.41 to 1.63) | <0.001  | 11,609    | 1.90 (1.73 to 2.07) | <0.001  |
| <b>Morphology</b>                     |           |                     |         |           |                     |         |
| Ductal carcinoma or ductal mixed      | 62,296    | Ref                 |         | 75,706    | Ref                 |         |
| Lobular carcinoma                     | 8,124     | 0.83 (0.78 to 0.88) | <0.001  | 9,127     | 0.88 (0.83 to 0.94) | <0.001  |
| Other                                 | 9,577     | 1.01 (0.96 to 1.06) | 0.741   | 8,664     | 0.96 (0.90 to 1.02) | 0.163   |
| <b>Breast surgery</b>                 |           |                     |         |           |                     |         |
| Mastectomy                            | 38,040    | Ref                 |         | 38,307    | Ref                 |         |
| Breast conserving therapy             | 38,638    | 0.84 (0.79 to 0.89) | <0.001  | 50,313    | 0.87 (0.81 to 0.94) | <0.001  |
| No surgery                            | 3,319     | 3.72 (3.46 to 4.0)  | <0.001  | 4,877     | 4.4 (4.1 to 4.8)    | <0.001  |
| <b>Axillary lymph node dissection</b> |           |                     |         |           |                     |         |
| No                                    | 34,562    | Ref                 |         | 62,478    | Ref                 |         |
| Yes                                   | 45,435    | 0.95 (0.90 to 1.00) | 0.060   | 31,019    | 1.38 (1.29 to 1.48) | <0.001  |
| <b>Chemotherapy</b>                   |           |                     |         |           |                     |         |
| No                                    | 55,980    | Ref                 |         | 58,690    | Ref                 |         |
| Yes                                   | 24,017    | 1.21 (1.15 to 1.28) | <0.001  | 34,807    | 0.99 (0.92 to 1.06) | 0.77    |
| <b>Hormonal therapy</b>               |           |                     |         |           |                     |         |
| No                                    | 48,712    | Ref                 |         | 48,152    | Ref                 |         |
| Yes                                   | 31,285    | 0.62 (0.60 to 0.65) | <0.001  | 45,345    | 0.45 (0.43 to 0.47) | <0.001  |
| <b>Targeted therapy†</b>              |           |                     |         |           |                     |         |
| No                                    | 79,272    | Ref                 |         | 86,088    | Ref                 |         |
| Yes                                   | 725       | 0.66 (0.54 to 0.82) | <0.001  | 7,409     | 0.58 (0.53 to 0.64) | <0.001  |

|                                     |       |                     |                  |        |                     |                  |
|-------------------------------------|-------|---------------------|------------------|--------|---------------------|------------------|
| <b>Radiotherapy</b>                 |       |                     |                  |        |                     |                  |
| No                                  | 33156 | Ref                 |                  | 34,422 | Ref                 |                  |
| Yes                                 | 46841 | 0.71 (0.68 to 0.75) | <b>&lt;0.001</b> | 59,075 | 0.67 (0.63 to 0.72) | <b>&lt;0.001</b> |
|                                     |       |                     |                  |        |                     |                  |
| <b>Second primary breast cancer</b> |       |                     |                  |        |                     |                  |
| No                                  | 76811 | Ref                 |                  | 90,026 | Ref                 |                  |
| Yes                                 | 3186  | 0.94 (0.87 to 1.03) | 0.169            | 3,471  | 1.02 (0.93 to 1.13) | 0.618            |

\*Cox univariable and multivariable proportional hazard models were developed to estimate hazard ratios with 95% confidence intervals (CI) for overall mortality. Follow-up was restricted to a maximum of 5 years. Median follow-up was 5.0 (0-5) years for the 1999-2005 cohort and 3.9 (0-5) years for the 2006-2012 cohort. In multivariable analysis all clinicopathological relevant variables and variables with a *p*-value <0.05 in univariable analysis were included. The assumption of proportional hazards was found to be valid by graphically plotting the log-log survival curves. A two-sided *p*-value ≤0.05 was considered statistically significant. Missing values were analyzed as separate unknown group within the same variable. B&R= Bloom & Richardson, CI= Confidence Interval, HR= Hazard Rate, N0= no pathologically assessed regional lymph nodes with metastasis/isolated tumour cells, N1= metastasis in 1-3 regional lymph nodes, N2= metastasis in 4-9 regional lymph nodes, N3= metastasis in ≥10 regional lymph nodes, Ref= reference category, T1a= ≤0.5 cm (including micro-invasion), T1b= >0.5 cm and ≤1 cm, T1c= >1 cm and ≤ 2 cm, T2= >2 cm and ≤5 cm, T3= >5 cm, T4= any size with direct extension to chest wall and/or to skin.

†Mainly trastuzumab.
